# Supplementary material for: A novel SERS substrate of MIL-100(Fe)/AgNFs for sensitive detection of ascorbic acid in cellular media
Source: Royal Society of Chemistry journal article supplement (doi:10.1039/d2ra04146d), 2022-01-01
Supplement: d2ra04146d1.pdf [file d2ra04146d1.pdf]

## Supporting Information

of

### **A novel SERS substrate of MIL-100(Fe)/AgNFs for sensitive detection of ascorbic acid in cellular media**

Wang Qiao <sup>a,b</sup>, Yiran Wang <sup>a,b</sup>, Zhenxia Zhao <sup>a</sup>, Yujiao Wang <sup>b</sup>, Kui Chen<sup>b</sup>, Zhongxing Zhao<sup>a,\*</sup>, Min Li<sup>b,\*</sup>

<sup>a</sup> *School of Chemistry and Chemical Engineering, Guangxi Key Laboratory of Agro-Environment and Agro-Product Safety, Guangxi University, Nanning 530004, China.*

<sup>b</sup> *CAS Key Laboratory for Biomedical Effects of Nanomaterials and Nanosafety, Institute of High Energy Physics, Chinese Academy of Sciences, Beijing 100049, China.*

### **Experimental section**

#### **Materials**

All chemicals are analytical grade and used without further purification. Silver nitrate, 3-mercaptopropyltrimethoxyalkane were purchased from Alfa Aesar Chemicals Co., Ltd. Mercaptopropionic acid, ferrous chloride, 1,3,5-benzenetricarboxylic acid, glutathione, glutamic acid, glycine and cysteine were obtained from Sigma-Aldrich Co. All other chemicals were bought from Chemical Reagent Beijing Co., Beijing, China. Deionized water from a triple distillation system was used throughout this work.

#### **Synthesis of AgNFs substrate**

The synthesis method of silver nanofilms is based on our previous research work with slight modifications.<sup>1</sup> The glass slides were

ultrasonically washed in ethanol and blown dried with nitrogen before treated with piranha solution ( $\text{H}_2\text{SO}_4:\text{H}_2\text{O}_2 = 3:1$ , solution should be handled with great care) at  $95\text{ }^\circ\text{C}$  for 40-60 min. After cleaning with deionized water, the glass slides were functionalized in a toluene solution containing 2% 3-mercaptopropyltrimethoxyalkane for 12 h. The modified glass sheets were immersed in a silver ammonia solution containing glutaraldehyde, and reacting at  $90\text{ }^\circ\text{C}$  for 4-6 min to obtain a silver nano-film (AgNFs). The surface of AgNFs substrate covered with a thin film of gold by using Ion Sputtering Instrument. Then the AgNFs substrate incubated with 10 mM mercaptopropionic acid (MPA) in ethanol solution for 3 h at room temperature. After cleaning with ethanol thoroughly, the modified substrate was soaked in ethanol for later use.

### **Preparation of AgNFs/MIL-100(Fe)**

The MIL-100(Fe) crystals anchored on the surface of silver nanofilms (AgNFs) were prepared by an in-situ synthesis method reported in the literature.<sup>2</sup> Briefly, 5.7 mmol ferrous chloride tetrahydrate ( $\text{FeCl}_2\cdot\text{H}_2\text{O}$ ) was dissolved in 48.6 mL deionized water (solution A). Secondly, prepare solution B: 11.4 mmol sodium hydroxide (NaOH) and 3.8 mmol 1,3,5-benzenetricarboxylic acid ( $\text{H}_3\text{BTC}$ ) was dissolved in 11.4 mL deionized water (solution B). Then solution B was added dropwise to solution A. The mixture was stirred at room temperature. After 4 h,

AgNFs was suspended into the mixed solution. At this stage,  $\text{Fe}^{2+}$  was oxidized to  $\text{Fe}^{3+}$  which gradually combined with  $\text{H}_3\text{BTC}$  to form the crystal structure of MIL-100(Fe) on AgNFs in situ. After 24 h, the formation of the composite MIL-100(Fe)/AgNFs was completed and the AgNFs substrate was taken out and washed with deionized water.

### **Gold spraying**

Two groups of MIL-100(Fe)/AgNFs substrates were selected to spray gold for comparison. The current of the first group was set at 2 mA with the spraying time of 60-140 s. The current of the second group was set at 5 mA with the spraying time of 10-80 s. After gold spraying, the substrate was used for in situ growth of MIL-100 (Fe) on AgNFs to form MIL-100(Fe)/AgNFs for SERS measurements.

### **Effect of pH on L-AA sensing**

MIL-100(Fe)/AgNFs was exposure to 5 mL of  $10^{-8}$  M L-AA aqueous solution with pH of 4, 4.5, 5, 5.2, 5.5, 6, 6.5, and 7, respectively, for 30 min reaction before SERS spectra were collected. In addition, MIL-100(Fe)/AgNFs was exposure to the aqueous solutions with the above pH value in the absence of L-AA was also tested as the control group. The pH was adjusted by using NaOH and HCl.

### **Preparation of Orange and Effervescent tablet**

Weigh 16.27g of oranges, squeeze out the juice and remove 4.81g of the residue. Dissolve the obtained orange juice in 100 mL of water and dilute to  $10^{-8}$  M~ $10^{-10}$  M. Weigh 4g of effervescent tablets, dissolve in 500 mL of water, and dilute to  $10^{-9}$  M~ $10^{-11}$  M. The L-AA content given in the content table of effervescent tablets is 203 mg/g.

### **Preparation of 4T1 cells and B16 cells**

4T1/B16 cells were seeded into 10 cm dishes and cultured in DMEM high-glucose medium containing 10 % fetal bovine serum and 1 % double antibody at 37 °C, 5 % CO<sub>2</sub>. When the cell confluence was about 80%, the cells were trypsinized and collected before being washed for three times with PBS. 4T1 or B16 cells were disrupted, centrifuged centrifugation at 12,000 rpm at 4°C for 10 min. Collections were diluted with different concentrations of L-AA in TBS buffer (pH=5.2). The cell concentration in each solution is approximately  $2.5 \times 10^4$  cells/mL.

### **Measurements**

Scanning electron microscopy (SEM) characterization was underwent using a Hitachi S-4800 at 3.0 and 10 kV. The samples was analyzed by X-ray diffraction (XRD, D8 Advance, Germany) at a scan rate of 5 °/min and a monochromatic X-ray beam at 40 kV. Raman spectra were obtained on a DXR Smart Raman spectrometer (Thermo Fisher, 780 nm, 60 mW, 10 μm diameter focal spot laser excitation, 15s integration time, and room temperature).

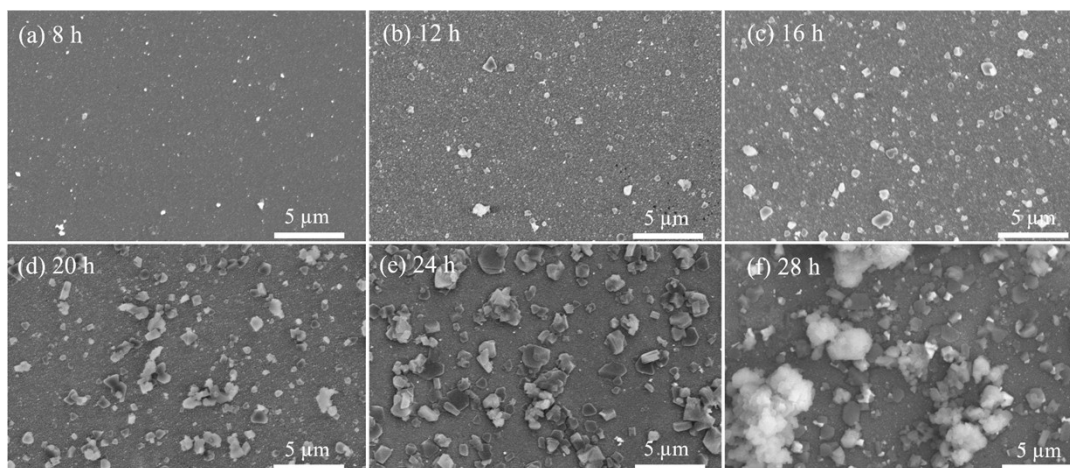

Fig. S1 SEM characterization of MIL-100(Fe)/AgNFs growing for different time.

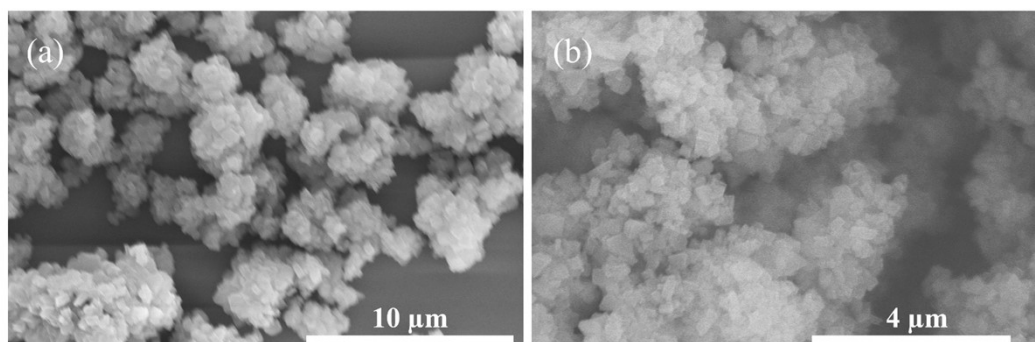

Fig. S2 SEM characterization of MIL-100(Fe) in solution instead on AgNFs surface after growing for 24 h.

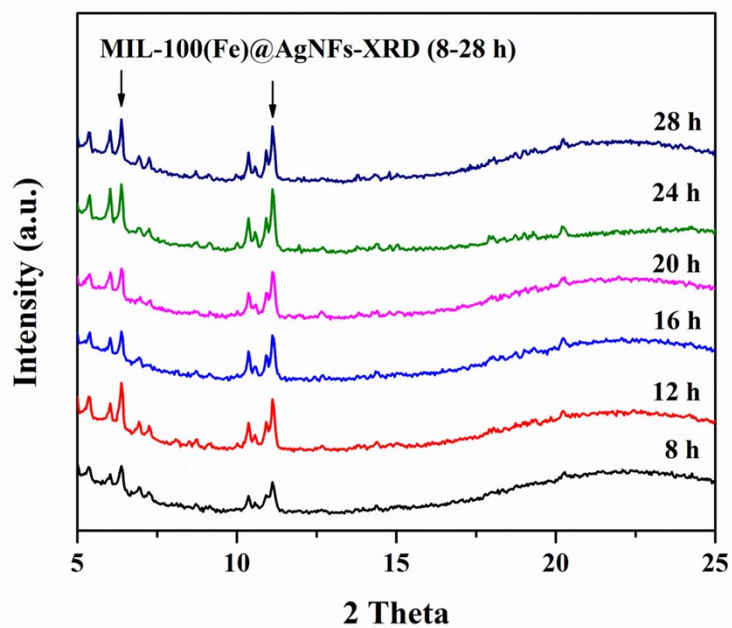

Fig. S3 (a) XRD of MIL-100(Fe) growing for 8~28 h on AgNFs.

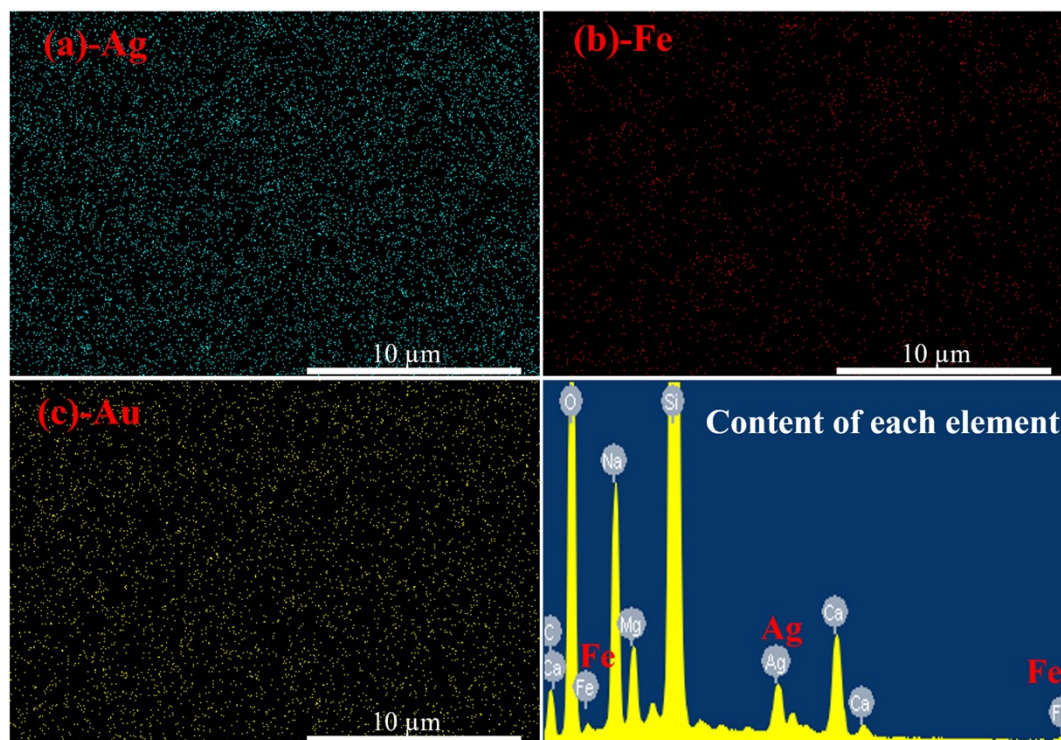

Fig. S4 EDS Characterization of Ag, Fe, Au elements in the as-prepared MIL-100(Fe)

/AgNFs substrate.

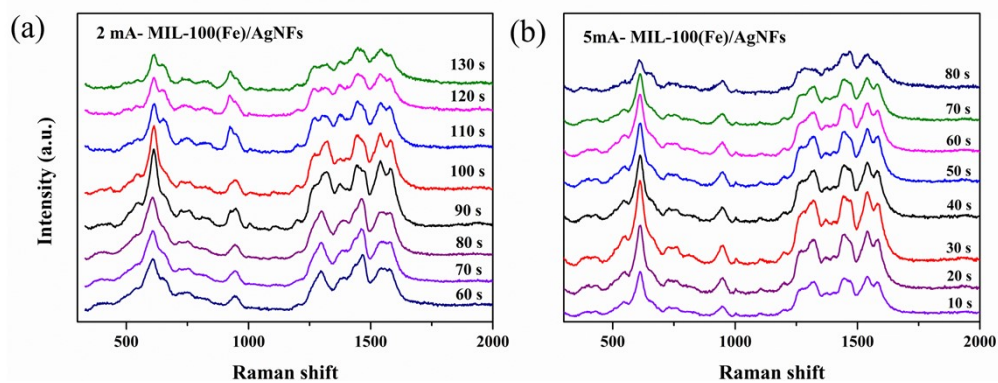

Fig. S5 Raman spectra of MIL-100(Fe)/AgNFs for different spraying time at the current of (a) 2 mA, (b) 5 mA.

#### References:

1. W. F. Zhu, L. X. Cheng, M. Li, D. Zuo, N. Zhang, H. J. Zhuang, D. Xie, Q. D. Zeng, J. A. Hutchison and Y. L. Zhao, *Anal Chem*, 2018, **90**, 10144-10151.
2. K. Guesh, C. A. D. Caiuby, Á. Mayoral, M. Díaz-García, I. Díaz and M. Sanchez-Sanchez, *Crystal Growth & Design*, 2017, **17**, 1806-1813.
